# Supplementary material
Source: Springer Nature journal article supplement (https://www.springermedizin.de/resource/supplementary/12885_2011_3084_MOESM2_ESM.pdf/9464230)

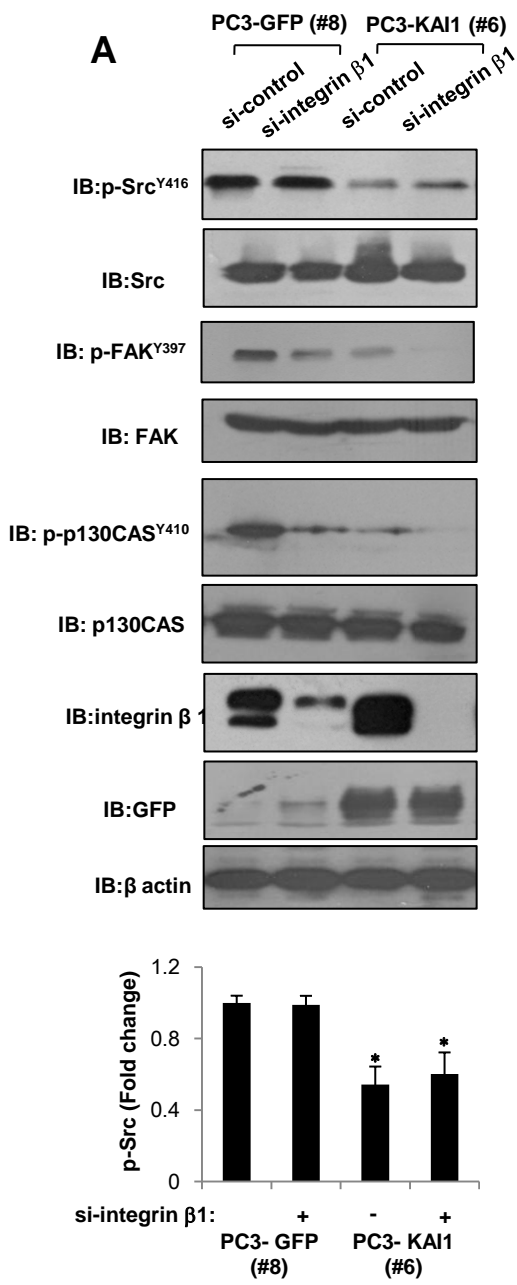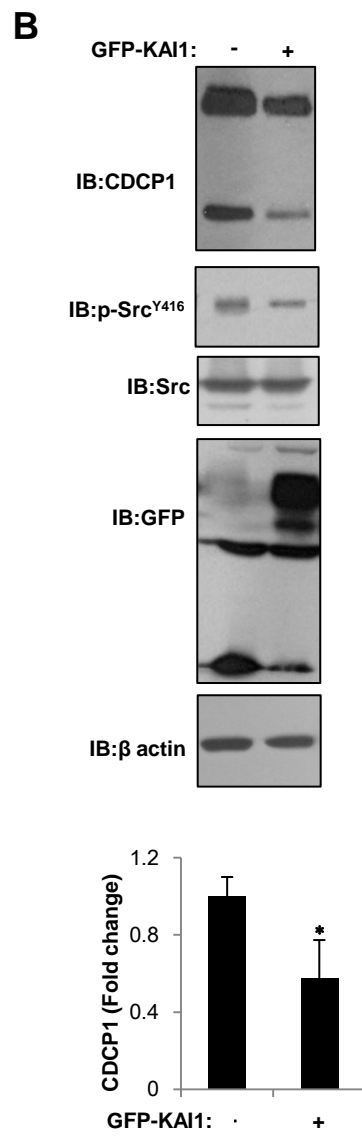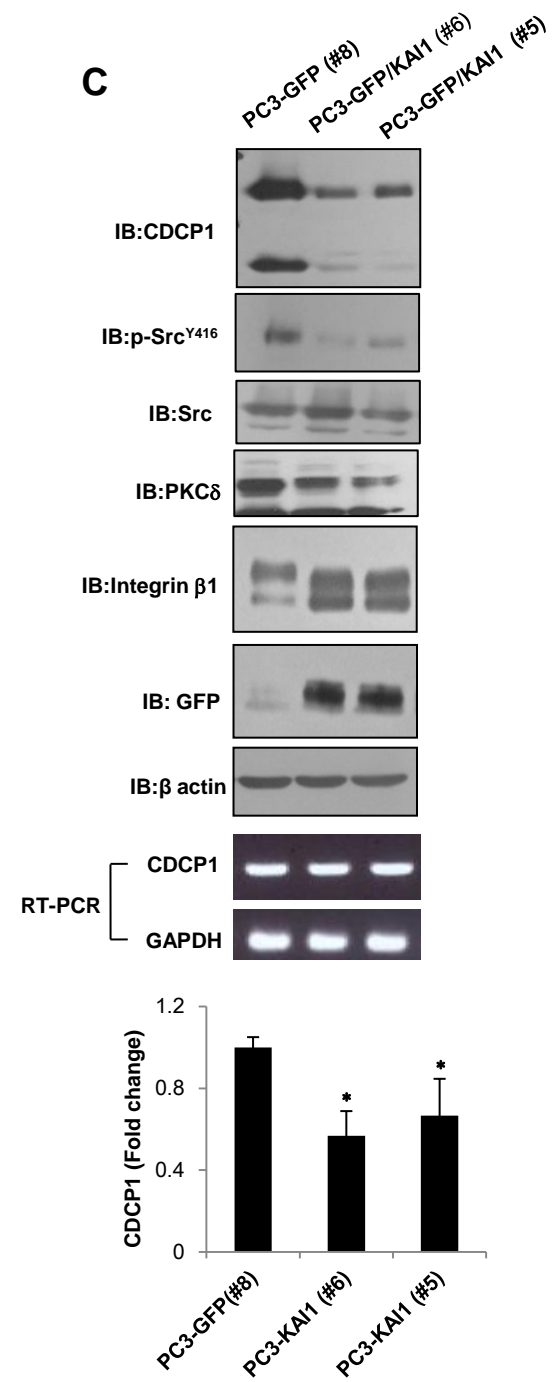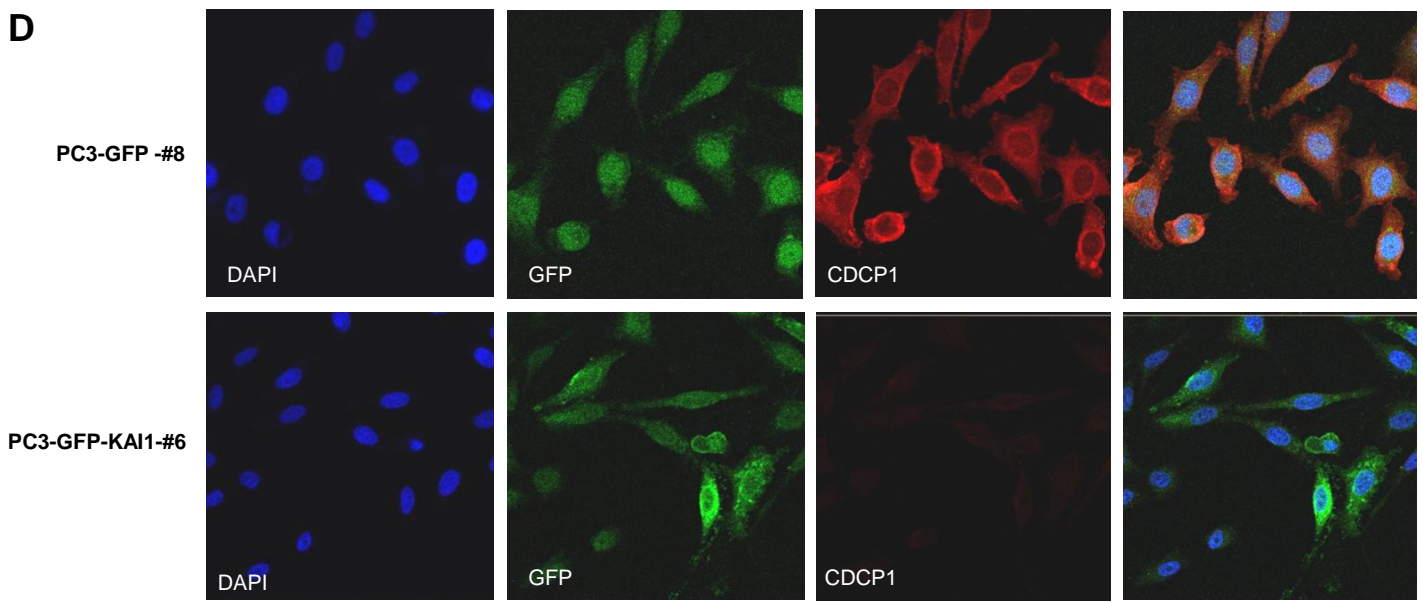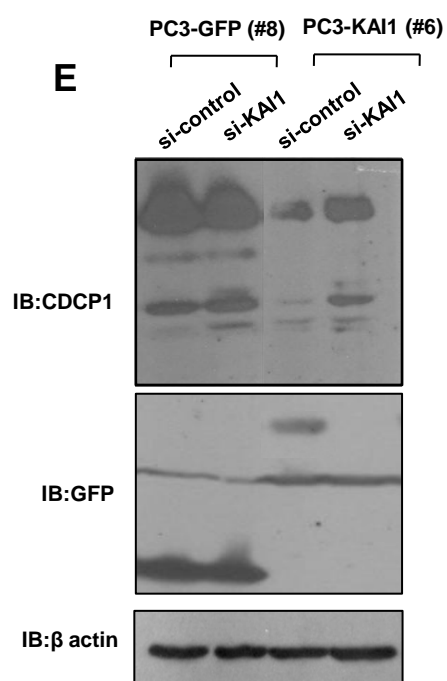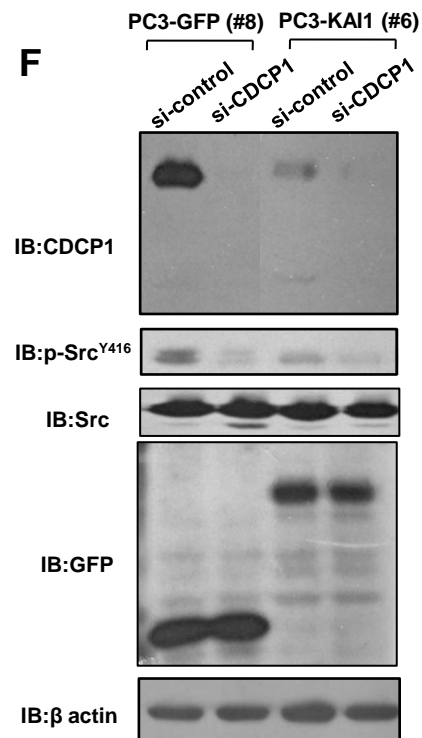

Supplement: MOESM2 [file 9464230]
